# Supplementary material for: Differential remodeling of the electron transport chain is required to support TLR3 and TLR4 signaling and cytokine production in macrophages
Source: PubMed Central journal article supplement (PMC6906364; doi:10.1038/s41598-019-55295-4), 2019-12-11

# **Differential remodeling of the electron transport chain is required to support TLR3 and TLR4 signaling and cytokine production in macrophages**

**Duale Ahmed<sup>1</sup>, David Roy<sup>2</sup>, Allison Jaworski<sup>2</sup>, Alex Edwards<sup>3</sup>, Alfonso Abizaid<sup>3</sup>, Ashok Kumar<sup>4,5</sup>, Ashkan Golshani<sup>1</sup>, Edana Cassol<sup>2\*</sup>**

<sup>1</sup>Department of Biology, Carleton University, Ottawa, Ontario, Canada

<sup>2</sup>Department of Health Sciences, Carleton University, Ottawa, Ontario, Canada

<sup>3</sup>Department of Neuroscience, Carleton University, Ottawa, Ontario, Canada

<sup>4</sup>Department of Pathology and Laboratory Medicine, Faculty of Medicine, University of Ottawa,

<sup>5</sup>Department of Pathology, The Children's Hospital of Eastern Ontario Research Institute, Ottawa, ON K1H 8L1

## Supplementary Information:

**Supplementary Table S1: List of reagents, chemical or kit used in this study, referenced from Methods section.**

**Supplementary Figure S1: PIC activation is associated with increased OXPHOS function under low glucose conditions.** BMDMs were plated onto Seahorse XFp miniplates and treated with 10 $\mu$ g/mL PIC for 18 hours. OXPHOS function was assessed *via* successive Oligomycin (Oligo), Carbonyl cyanide-*p*-trifluoromethoxyphenylhydrazone (FCCP), and Rot/AA injections **(a)**. Quantification of the spare respiratory capacity percentage (SRC%) **(b)** and ATP production **(c)**. Data shown represents a test run using one representative animal.

**Supplementary Figure S2: TRIF and TRAF6 expression during PIC activation is not affected by glucose levels.** Macrophages stimulated either with LPS or PIC for 18 hours under high glucose **(a)** or low glucose **(b)** media conditions were examined for differences in TLR signaling. Protein levels of TRIF and TRAF6 were measured via immunoblotting. Data shown represents blots from a representative animal while data shown represents mean  $\pm$  SEM of two individual mice.

**Supplementary Figure S3: Targeting ETC function leads to complete loss of IFN responses.** LPS- **(a)** or PIC- **(b)** stimulated BMDMs were co-treated with a panel of ETC (Rotenone, Antimycin, Cyanide) inhibitors to assess the importance of mitochondrial function to antiviral responses. CXCL10 and TNF- $\alpha$  cytokine secretion was measured after 18 hours in high glucose or low glucose media conditions. Data shown represents a mean of two individual animals.

**Supplementary Figure S4: Targeting mitochondrial ROS leads to loss of type I IFN production.** LPS- **(a)** or PIC- **(b)** stimulated BMDMs were co-treated with a panel of mtROS (MT, S3QEL, NAC) modulators to assess the importance of mitochondrial function to antiviral responses. CXCL10 and TNF- $\alpha$  cytokine secretion was measured after 18 hours in high glucose or low glucose media conditions. Data shown represents a mean of two individual animals.

**Supplementary Figure S6: Uncropped Images of Figure 4**

**Supplementary Figure S7: Uncropped Images of Figure 5**

**Supplementary Figure S8: Uncropped Images of Figure 7**

**Supplementary Figure S9: Uncropped Images of Supplementary Figure S2**

**Supplementary Table S1: List of reagents, chemical or kit used in this study.**

| Reagent or Resource                            |                            |                |                        |        |
|------------------------------------------------|----------------------------|----------------|------------------------|--------|
| Antibodies                                     | Supplier                   | Catalog Number | Additional Information |        |
|                                                |                            |                | Isotype                | Host   |
| SDHB Monoclonal Antibody                       | Abcam                      | ab14714        | IgG2a                  | Mouse  |
| SOD2 (D3X8F) XP® monoclonal antibody           | Cell Signalling Technology | 13141          | IgG                    | Rabbit |
| IRF3 Polyclonal Antibody                       | ThermoFisher               | PA5-20086      | IgG                    | Rabbit |
| Phospho-IRF3 (Ser385) Polyclonal Antibody      | ThermoFisher               | PA5-38285      | IgG                    | Rabbit |
| IRF7 Polyclonal Antibody                       | ThermoFisher               | PA5-79519      | IgG                    | Rabbit |
| Phospho-IRF7 (Ser477) Polyclonal Antibody      | ThermoFisher               | PA5-64834      | IgG                    | Rabbit |
| NDUFB8 Monoclonal Antibody (Complex I)         | ThermoFisher               | 459210         | IgG1, kappa            | Mouse  |
| UQCRC2 Polyclonal Antibody (Complex III)       | ThermoFisher               | PA5-30204      | IgG                    | Rabbit |
| COX4/Complex IV Monoclonal Antibody            | ThermoFisher               | A21348         | IgG2a, kappa           | Mouse  |
| GPX4 Polyclonal Antibody                       | ThermoFisher               | PA5-79321      | IgG                    | Rabbit |
| Ikbα Polyclonal Antibody                       | ThermoFisher               | PA5-22120      | IgG                    | Rabbit |
| Anti-Mouse IgG HRP-linked Secondary Antibody   | Abcam                      | ab6789         | IgG                    | Goat   |
| Anti-Rabbit IgG, HRP-linked Secondary Antibody | Cell Signalling Technology | 7074           | IgG                    | Goat   |
| Cell Culture                                   | Supplier                   | Catalog Number |                        |        |
| DMEM, high glucose, pyruvate                   | Life Technologies          | 11995-073      |                        |        |
| DMEM, no glucose, no glutamine, no pyruvate    | Life Technologies          | A1443001       |                        |        |
| FBS                                            | Life Technologies          | 12484-028      |                        |        |
| Penicillin-Streptomycin (10,000 U/mL)          | Life Technologies          | 15140-122      |                        |        |
| Glucose Solution (200g/L)                      | Life Technologies          | A2494001       |                        |        |
| Sodium Pyruvate (100 mM)                       | Life Technologies          | 11360070       |                        |        |
| L-Glutamine (200 mM)                           | Life Technologies          | 25030081       |                        |        |
| Chemicals                                      | Supplier                   | Catalog Number |                        |        |

|                                                    |                   |                       |
|----------------------------------------------------|-------------------|-----------------------|
| Lipopolysaccharide                                 | Invivogen         | tIrl-eklps            |
| Poly(I:C), High molecular weight                   | Invivogen         | tIrl-pic-5            |
| MitoTempo                                          | Sigma             | SML0737               |
| N-Acetyl-L-cysteine                                | Sigma             | A9165                 |
| Antimycin A                                        | Sigma             | A8674                 |
| Rotenone                                           | Sigma             | R8875                 |
| Oligomycin                                         | Sigma             | O4876                 |
| FCCP                                               | Sigma             | C2920                 |
| Potassium Cyanide                                  | Sigma             | 60178                 |
| 2-deoxyglucose                                     | Sigma             | D6134                 |
| S3QEL                                              | Cedarlane         | 5735/10               |
| <b>Commerical Kits</b>                             | <b>Supplier</b>   | <b>Catalog Number</b> |
| Mouse IL-1 beta/IL-1F2 DuoSet ELISA Kit            | R&D Systems       | DY401                 |
| Mouse IL-6 DuoSet ELISA Kit                        | R&D Systems       | DY406                 |
| Mouse IL-10 DuoSet ELISA Kit                       | R&D Systems       | DY417                 |
| Mouse TNF-alpha DuoSet ELISA Kit                   | R&D Systems       | DY410                 |
| Mouse CXCL10/IP-10/CRG-2 DuoSet ELISA Kit          | R&D Systems       | DY466                 |
| IFN alpha/IFN beta 2-Plex Mouse ProcartaPlex Panel | Life Technologies | EPX020-22187-901      |
| Hydrogen Peroxide Assay Kit (Cell-based)           | Abcam             | ab138874              |
| Seahorse XFp Glycolytic Rate Assay Kit             | Aglient           | 103346-100            |
| Seahorse XFp Cell Mito Stress Test Kit             | Aglient           | 103010-100            |
| <b>Reagents</b>                                    | <b>Supplier</b>   | <b>Catalog Number</b> |
| Image-iT™ TMRM Reagent                             | Invitrogen        | I34361                |
| MitoSOX™ Red Mitochondrial Superoxide Indicator    | Invitrogen        | M36008                |
| CellROX™ Orange Reagent                            | Invitrogen        | C10443                |
| <b>Western Blot Accessories</b>                    | <b>Supplier</b>   | <b>Catalog Number</b> |
| Halt™ Protease and Phosphatase Inhibitor Cocktail  | ThermoFisher      | 78440                 |

|                                                     |              |         |
|-----------------------------------------------------|--------------|---------|
| RIPA Lysis and Extraction Buffer                    | ThermoFisher | 89900   |
| DC™ Protein Assay Kit II                            | Bio-Rad      | 5000112 |
| TGX Stain-Free™<br>FastCast™ Acrylamide Kit,<br>12% | Bio-Rad      | 1610185 |
| Trans-Blot® Turbo™ RTA<br>Mini PVDF Transfer Kit    | Bio-Rad      | 1704272 |
| Clarity™ Western ECL<br>Substrate                   | Bio-Rad      | 1705060 |

# Supplementary Figure S1

**a**

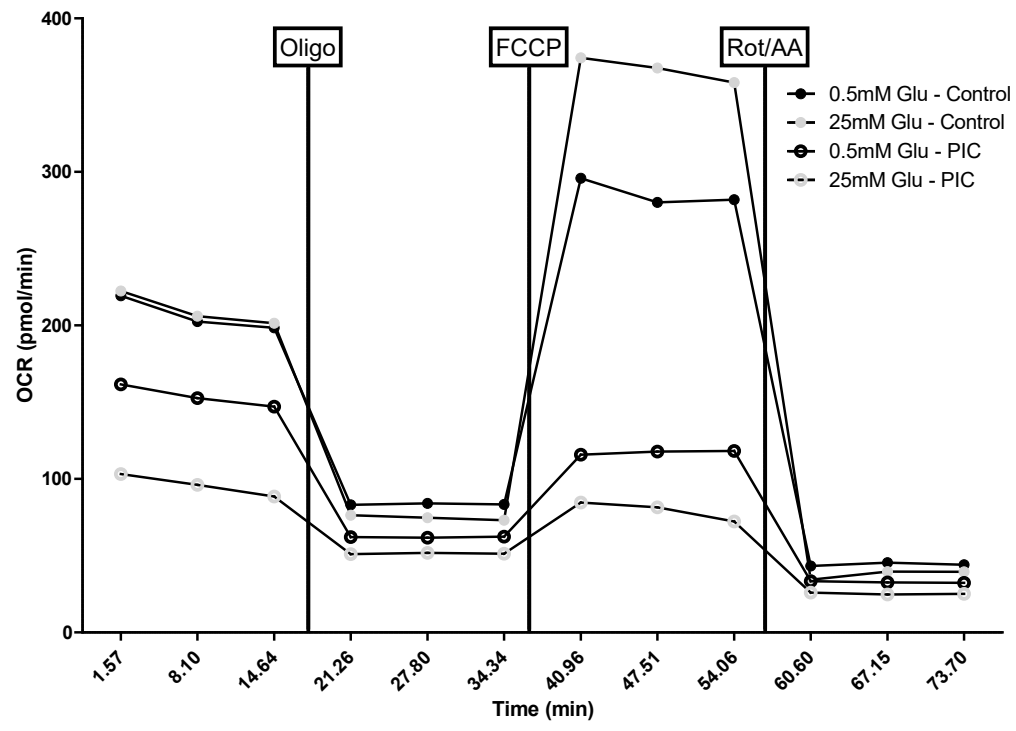

**b**

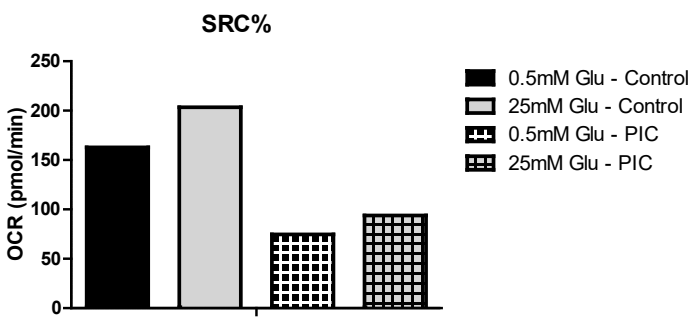

**c**

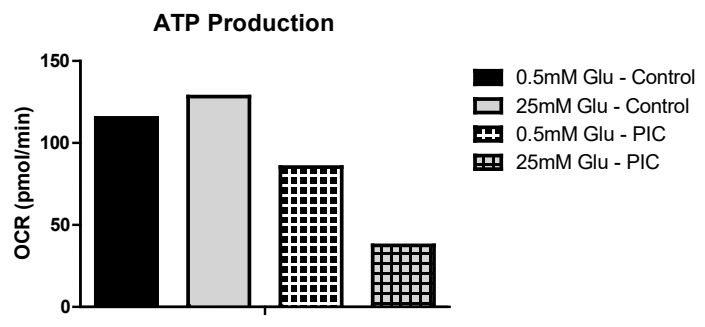

# Supplementary Figure S2

**a**

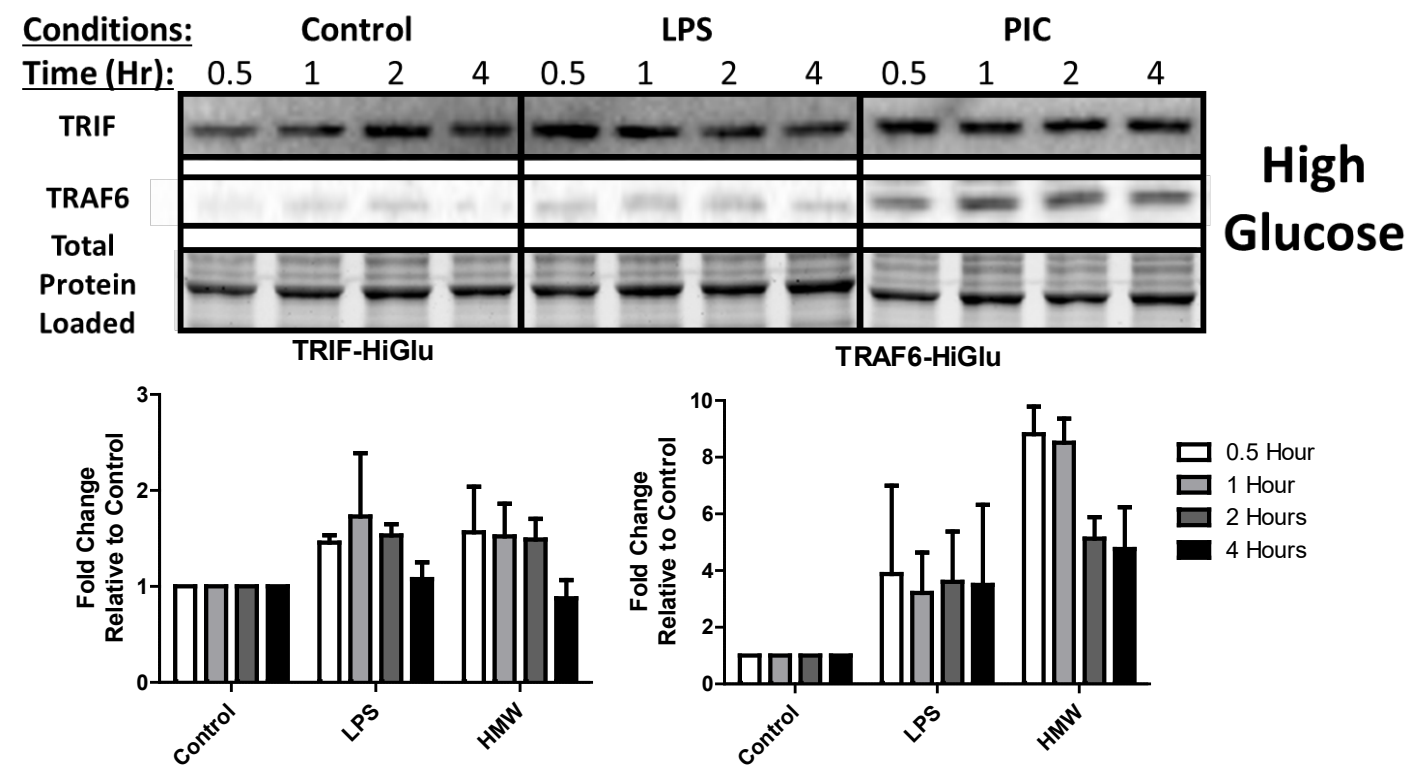

**b**

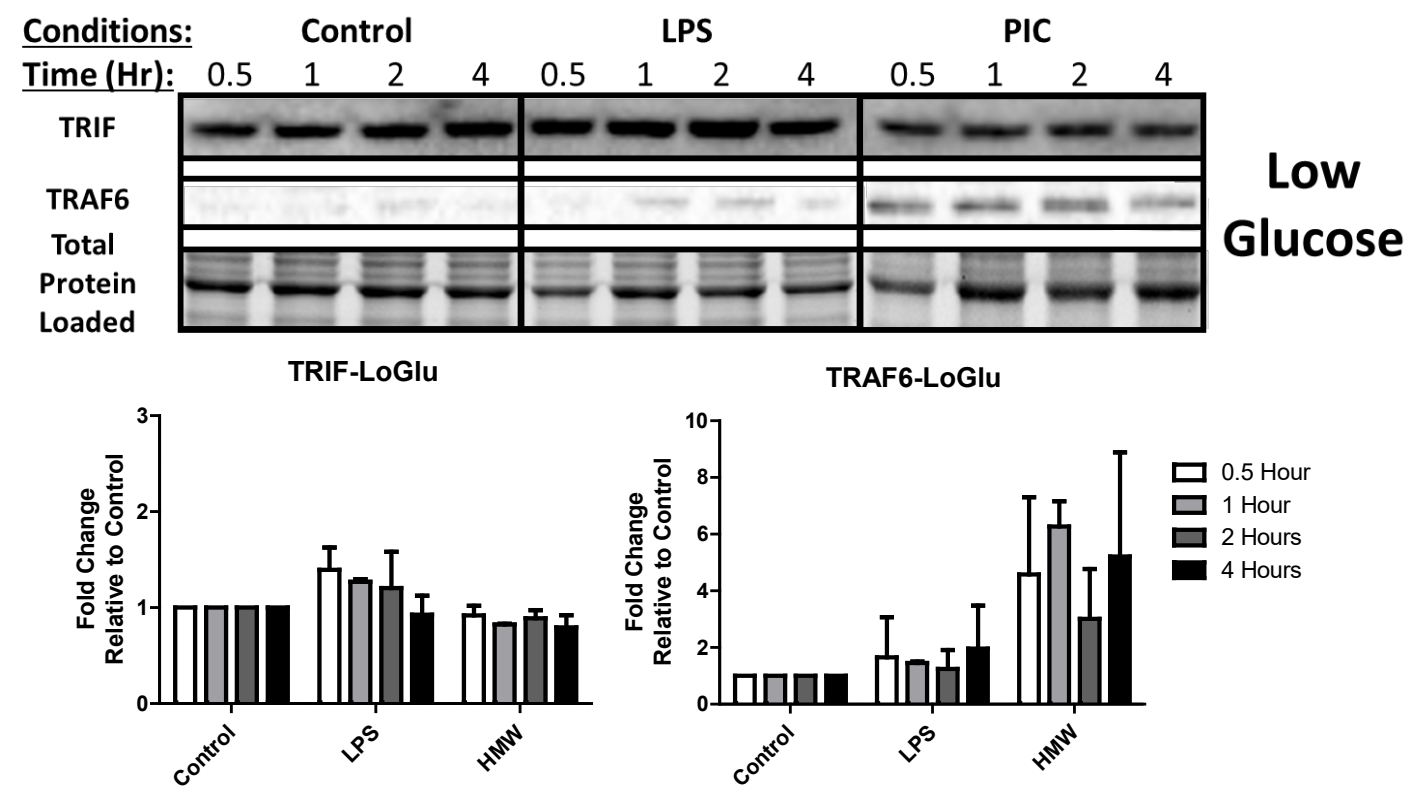

# Supplementary Figure S3

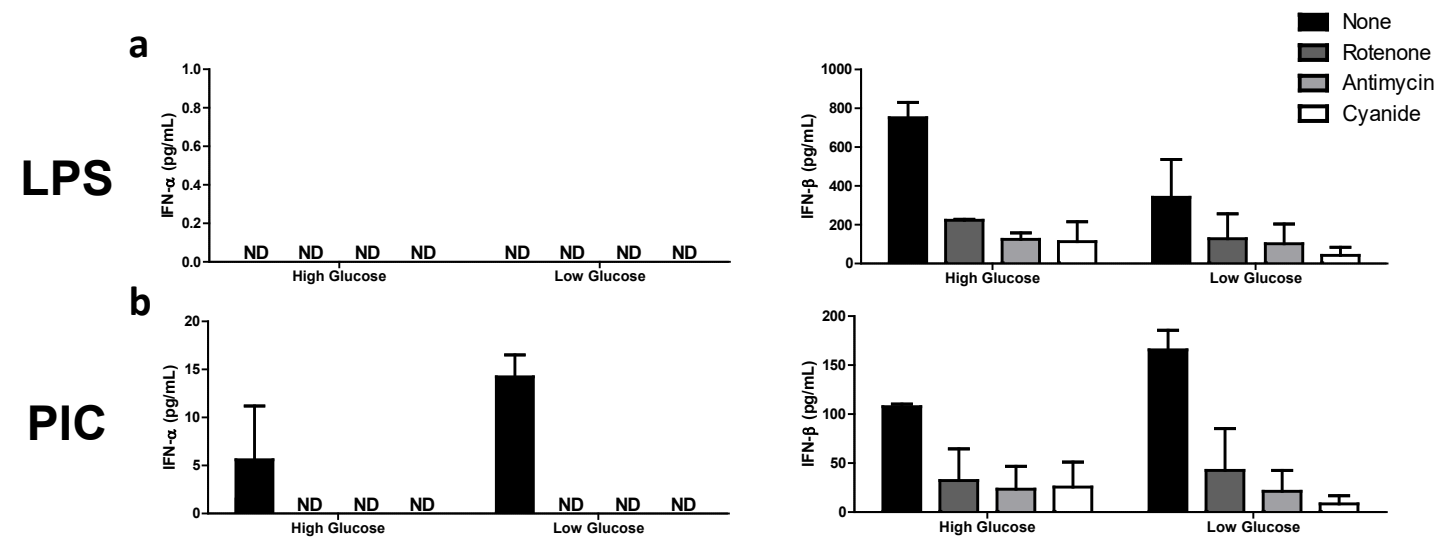



# Supplementary Figure S4

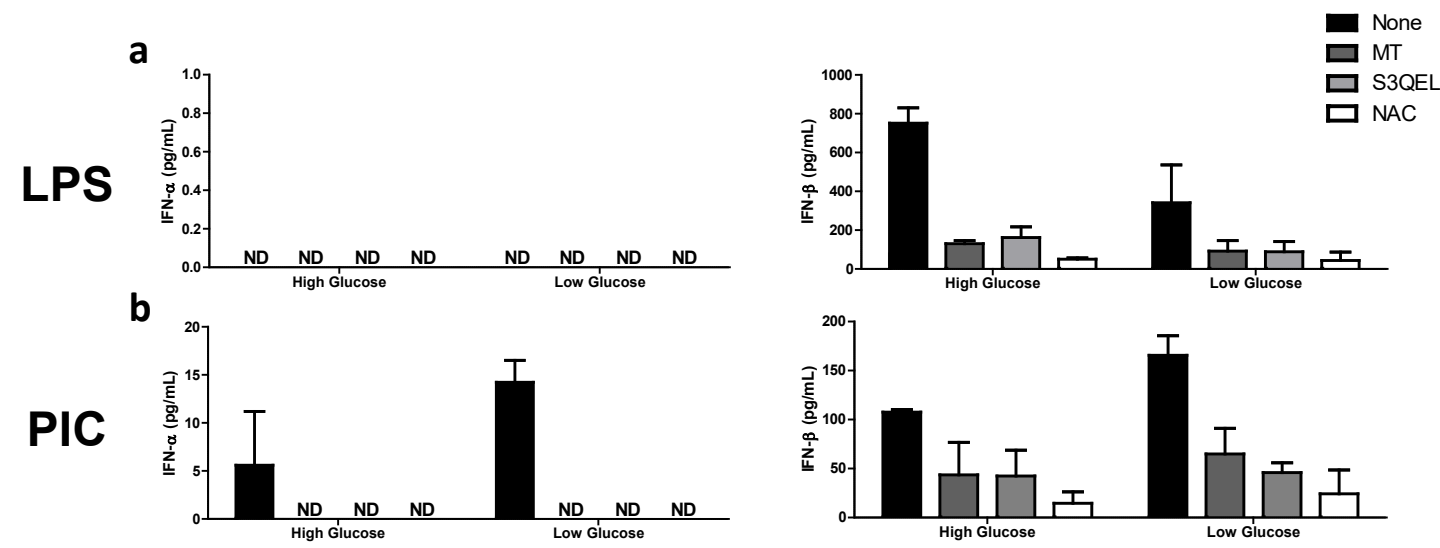



# Supplementary Figure S6 – Uncropped Images of Figure 5

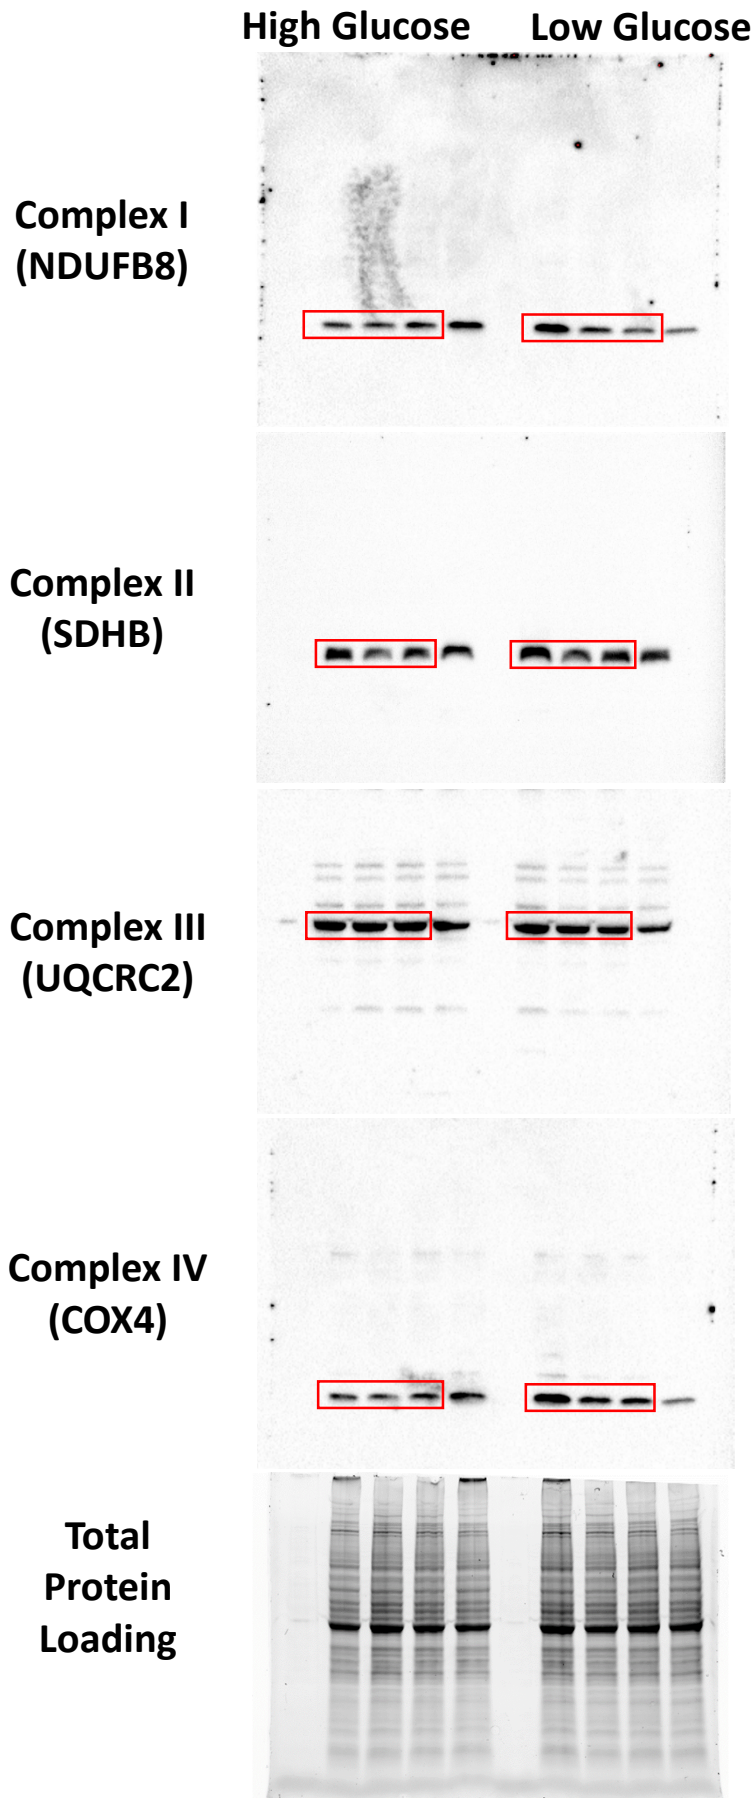

# Supplementary Figure S7 – Uncropped Images of Figure 7

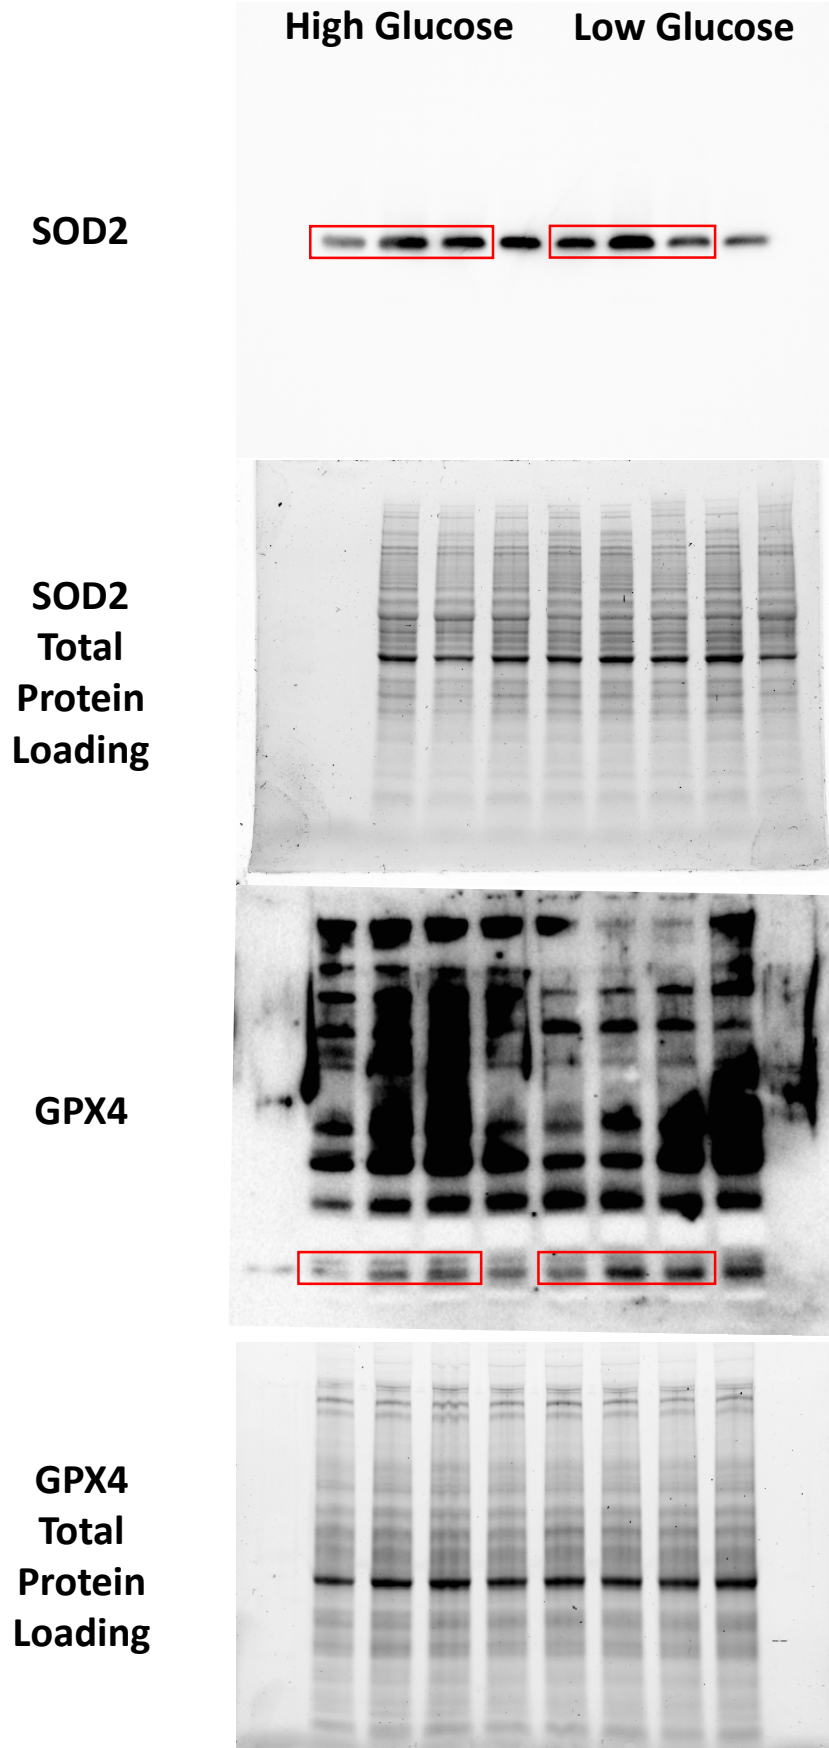

# Supplementary Figure S8 – Uncropped Images of Supplementary Figure S2

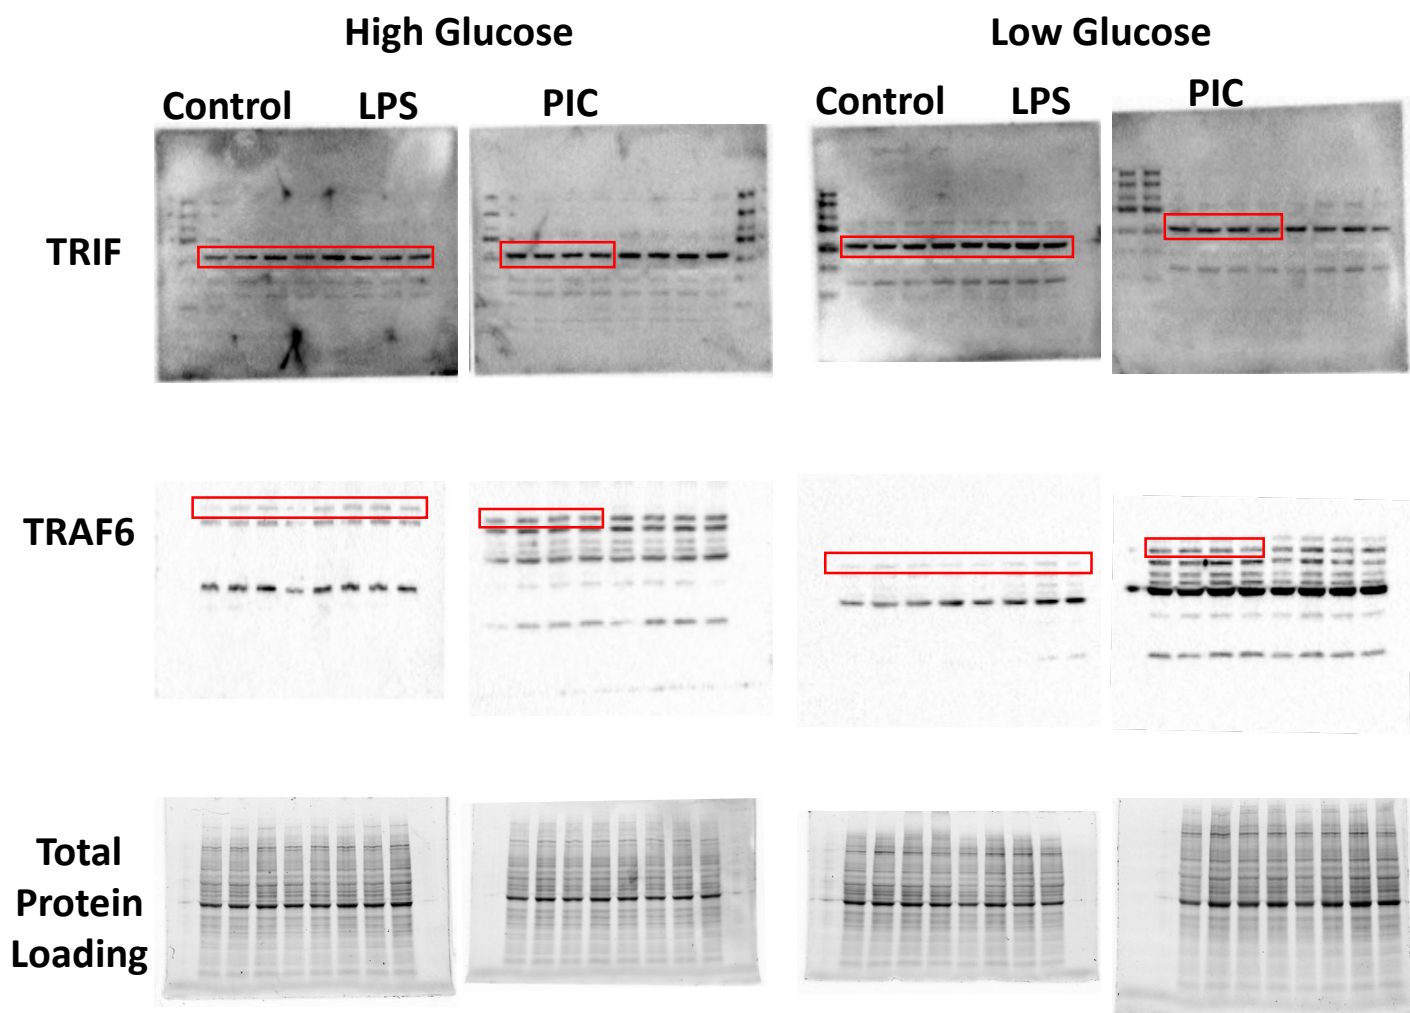

Supplement: 41598_2019_55295_MOESM1_ESM.pdf [file 41598_2019_55295_MOESM1_ESM.pdf]
